# Supplementary material
Source: HighWire-hosted journal article supplement (https://www.annfammed.org/highwire/filestream/7966/field_highwire_adjunct_files/0/Stephens_Suppl_Fig.pdf)

**Online Supplementary Material**

Stephens GS, Blanken SE, Greiner KA, Chumley HS. Visual prompt poster for promoting patient-physician conversations on weight loss. *Ann Fam Med.* 2008;6(suppl 1):s33-s36.

[http://www.annfammed.org/cgi/content/full/6/suppl\\_1/s33/DC1](http://www.annfammed.org/cgi/content/full/6/suppl_1/s33/DC1)

**Supplemental Figure. Visual prompt poster in English and Spanish.**

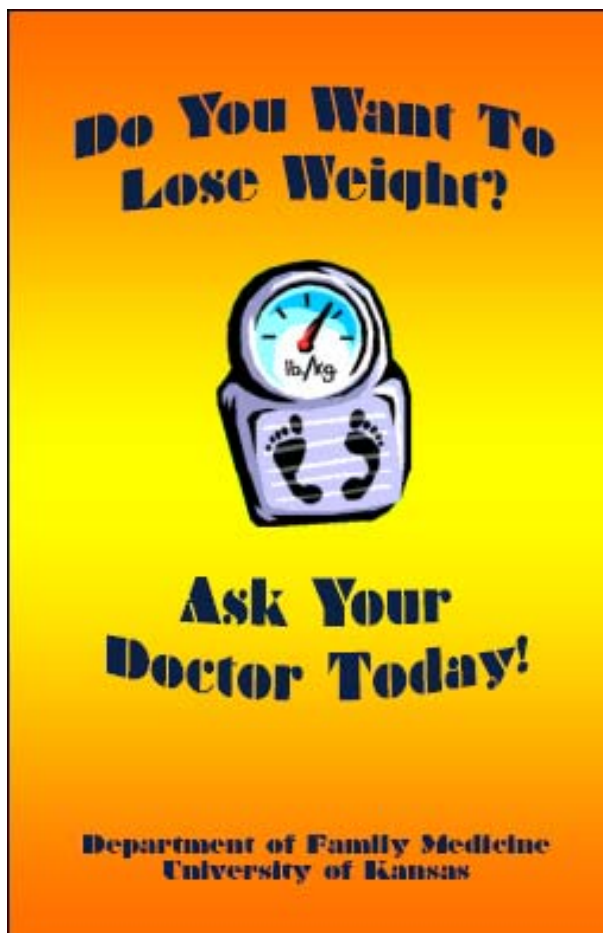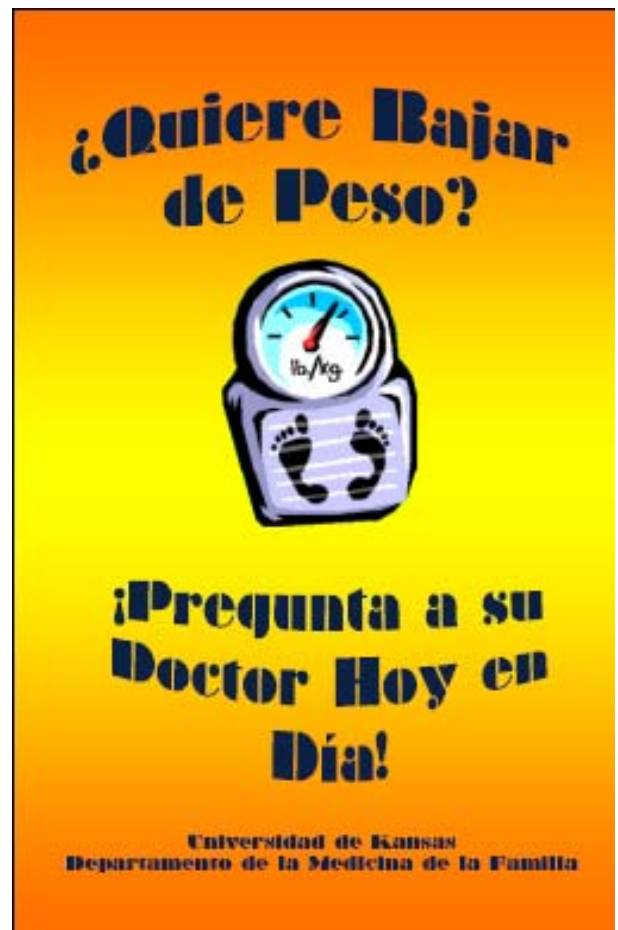

Supplement: Stephens_Suppl_Fig.pdf [file Stephens_Suppl_Fig.pdf]
